# Supplementary material
Source: PubMed Central journal article supplement (PMC2903360)
Supplement: supp_M109.041046_jbc.M109.041046-1.pdf [file supp_M109.041046_jbc.M109.041046-1.pdf]

## SUPPLEMENTARY DATA

### The TSG-6/HC2-mediated transfer is a dynamic process shuffling HCs between glycosaminoglycans

Kristian W. Sanggaard, Carsten Scavenius, Anna Julie Rasmussen, Hans-Georg Wisniewski, Ida B. Thøgersen, and Jan J. Enghild

#### Table S1.

*Peptide mass fingerprinting analyses of HC•HA complexes (Fig. 4)*

TSG-6/HC2 was allowed to transfer HCs from IαI to HA. The sample was subjected to reduced SDS-PAGE followed by Coomassie blue staining (Fig. 4). To identify the protein content in the expected HC•HA complexes (Fig. 4, band a-c), the bands of interest were excised from the gel, the proteins digested with trypsin, and finally identified by peptide mass fingerprinting analyses using a Micromass Q-TOF Ultima Global mass spectrometer (Waters). The table shows the significant hits as defined by Mascot probability analysis. The migration in the gel and the identifications shown below strongly suggest that “band a” contains HC1•HA•HC2 complexes, “band b” contains HC2•HA complexes, and “band c” contains HC1•HA complexes.

#### **Proteins identified in band a:**

##### **Inter-alpha-trypsin inhibitor heavy chain H2 precursor (Human)**

|                                 |        |
|---------------------------------|--------|
| Accession number:               | P19823 |
| Protein score:                  | 85     |
| Number of mass values searched: | 62     |
| Number of mass values matched:  | 10     |
| Sequence coverage (%):          | 14     |

| Peptide              | Mr (expt) | Mr (calc) | Δ Mr  |
|----------------------|-----------|-----------|-------|
| VVNNSPQPQNVVFDVQIPK  | 2121,09   | 2121,12   | -0,03 |
| VQFELHYQEVK          | 1418,72   | 1418,72   | 0,00  |
| IYLPGR               | 845,48    | 845,48    | 0,00  |
| HLEVDVWVIEPQGLR      | 1788,95   | 1788,95   | 0,00  |
| FLHVPDTFEGHFDGVPVISK | 2240,10   | 2240,13   | -0,03 |
| AHVSFKPTVAQQR        | 1467,81   | 1467,79   | 0,02  |
| AEDHFSVIDFNQIR       | 1803,88   | 1803,85   | 0,03  |
| IQPSGGTNINEALLR      | 1581,84   | 1581,85   | -0,01 |
| LSNENHGIAQR          | 1237,62   | 1237,62   | 0,00  |
| FYNQVSTPLLR          | 1336,71   | 1336,71   | 0,00  |

### Inter-alpha-trypsin inhibitor heavy chain H1 precursor (Human)

Accession number: P19827

Protein score: 94

Number of mass values searched: 62

Number of mass values matched: 10

Sequence coverage (%): 16

| Peptide               | Mr (expt) | Mr (calc) | Δ Mr  |
|-----------------------|-----------|-----------|-------|
| QAVDTAVDGVFIR         | 1389,72   | 1389,73   | -0,01 |
| FAHYVVTSQVVNTANEAR    | 2004,94   | 2005,00   | -0,06 |
| EVAFDLEIPK            | 1159,59   | 1159,61   | -0,02 |
| TAFISDFAVTADGNAFIGDIK | 2172,06   | 2172,07   | -0,01 |
| AAISGENAGLVR          | 1156,61   | 1156,62   | -0,01 |
| LDAQASFLPK            | 1088,56   | 1088,59   | -0,03 |
| GSLVQASEANLQAAQDFVR   | 2002,99   | 2003,01   | -0,02 |
| GFSLDEATNLNGLLR       | 1675,88   | 1675,85   | 0,03  |
| QYYEGSEIVVAGR         | 1469,70   | 1469,71   | -0,01 |
| TFVSALQPSPHSSSNTQR    | 2157,06   | 2157,08   | -0,02 |

Total score of P19823 and P19827 mixture: 179

**Protein identified in band b:**

**Inter-alpha-trypsin inhibitor heavy chain H2 precursor (Human)**

Accession number: P19823  
Protein score: 90  
Number of mass values searched: 25  
Number of mass values matched: 8  
Sequence coverage (%): 10

| Peptide             | Mr (expt) | Mr (calc) | Δ Mr  |
|---------------------|-----------|-----------|-------|
| VQSTITSR            | 890,49    | 890,48    | 0,01  |
| VVNNSPQPQNVVFDVQIPK | 2121,12   | 2121,12   | 0,00  |
| IYLQPGR             | 845,48    | 845,48    | 0,00  |
| AHVSFKPTVAQQR       | 1467,83   | 1467,79   | 0,04  |
| AEDHFSVIDFNQNIR     | 1803,87   | 1803,85   | 0,02  |
| IQPSGGTNINEALLR     | 1581,84   | 1581,85   | -0,01 |
| LSNENHGIAQR         | 1237,62   | 1237,62   | 0,00  |
| FYNQVSTPLLR         | 1336,71   | 1336,71   | 0,00  |

**Protein identified in band c:**

**Inter-alpha-trypsin inhibitor heavy chain H1 precursor (Human)**

Accession number: P19827  
Protein score: 84  
Number of mass values searched: 47  
Number of mass values matched: 8  
Sequence coverage (%): 14

| Peptide               | Mr (expt) | Mr (calc) | Δ Mr  |
|-----------------------|-----------|-----------|-------|
| QAVDTAVDGVFIR         | 1389,73   | 1389,73   | 0,00  |
| TAFISDFAVTADGNAFIGDIK | 2172,06   | 2172,07   | -0,01 |
| AAISGENAGLVR          | 1156,61   | 1156,62   | -0,01 |

|                      |         |         |       |
|----------------------|---------|---------|-------|
| QLVHHFEIDVDIFEPQGISK | 2350,19 | 2350,2  | -0,01 |
| GSLVQASEANLQAAQDFVR  | 2003,01 | 2003,01 | 0,00  |
| GFSLDEATNLNGGLLR     | 1675,89 | 1675,85 | 0,04  |
| QYYEGSEIVVAGR        | 1469,72 | 1469,71 | 0,01  |
| TFVSALQPSPTHSSSNTQR  | 2157,06 | 2157,08 | -0,02 |
